# Supplementary material
Source: PubMed Central journal article supplement (PMC6625784)
Supplement: NIHMS1006904-supplement-1.pdf [file NIHMS1006904-supplement-1.pdf]

Copyright WILEY-VCH Verlag GmbH & Co. KGaA, 69469 Weinheim, Germany, 2016.

## Supporting Information

### **Novel redox-responsive polymeric magnetosomes with tunable magnetic resonance property for *in vivo* drug release visualization and dual-modal cancer therapy**

*Zhongling Wang*<sup>†\*</sup>, *Xiangdong Xue*<sup>†</sup>, *Yixuan He*, *Ziwei Lu*, *Bei Jia*, *Hao Wu*, *Ye Yuan*, *Yee Huang*, *Han Wang*, *Hongwei Lu*, *Kit S. Lam*, *Tzu-yin Lin*, *Yuanpei Li*<sup>\*</sup>

Dr. Z. Wang and Dr. H. Wang

Department of Radiology, Shanghai General Hospital, **Shanghai Jiao Tong University School of Medicine**,  
Shanghai 200080, China.

Dr. Z. Wang, Dr. X. Xue, Y. He, B. Jia, Dr. H. Wu, Y. Yuan, Y. **H. Lu**, Huang, Dr. Prof. K. S. Lam and Dr.  
Prof. Y. Li

Department of Biochemistry and Molecular Medicine, UC Davis Comprehensive Cancer Center, University of  
California Davis, Sacramento, CA 95817, USA.

Dr. Z. Lu

Department of Radiology, the First Affiliated Hospital of Soochow University, Suzhou, Jiangsu 215006, China

Dr. T-Y. Lin

Division of Hematology/Oncology, Department of Internal Medicine, University of California Davis,  
Sacramento, California 95817, USA

Z. Wang and X. Xue contributed equally to this work.

E-mail: Z. Wang (zlwang138136@126.com) and Y.Li (email: lypli@ucdavis.edu)

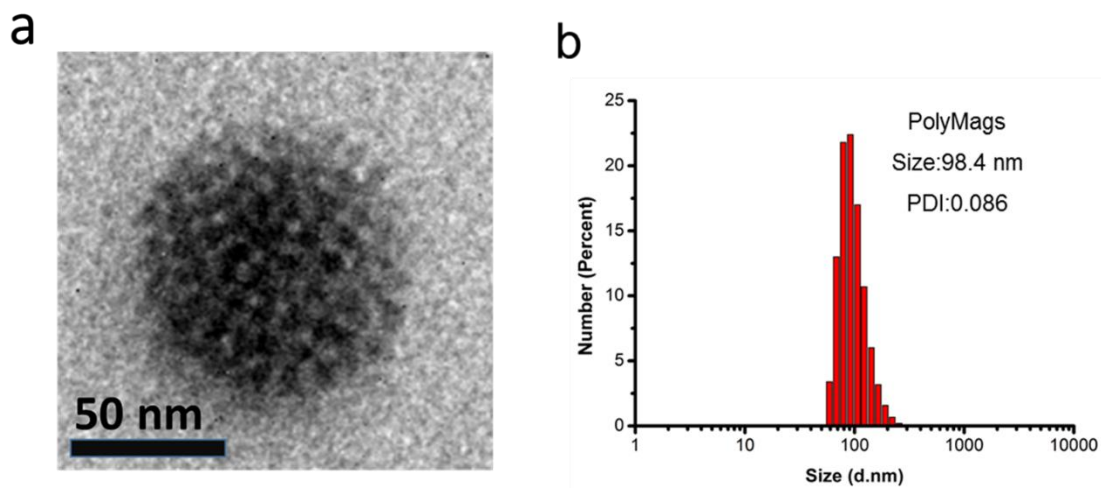

17 **Figure. S1** a) TEM micrograph of empty PolyMags. b) Size distributions of empty PolyMags  
18 nanoparticles tested by DLS. PDI:0.086; size: 98.4 nm.  
19  
20  
21  
22  
23  
24  
25  
26  
27  
28  
29  
30  
31  
32  
33  
34  
35  
36  
37  
38  
39  
40  
41  
42  
43  
44  
45  
46  
47  
48  
49  
50  
51  
52  
53  
54  
55  
56  
57  
58  
59  
60  
61  
62  
63  
64  
65

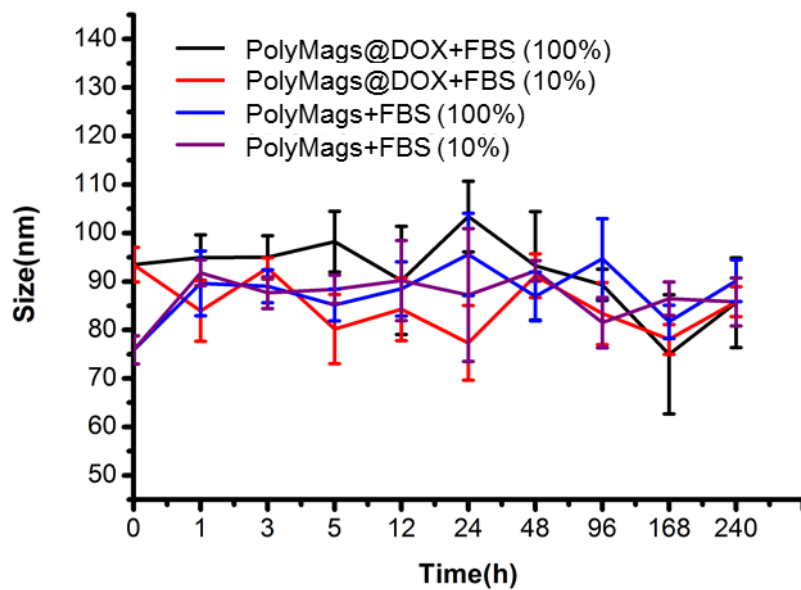

**Figure. S2.** The stability studies in particle size changes of the PolyMags@DOX (2 mg/mL) and empty PolyMags in fetal bovine serum (FBS). Empty PolyMags and PolyMags@DOX nanoparticles were incubated with FBS (100% and 10%). The size distribution of the nanoparticles was measured by DLS instrument after incubation with FBS at different time points from 0 to 240 h.

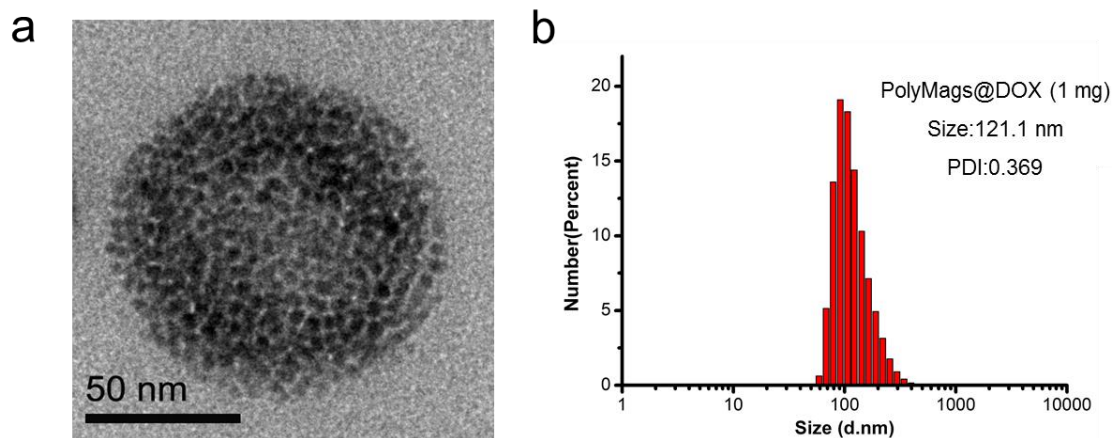

**Figure. S3.** a) TEM micrograph of the PolyMags@DOX (1 mg/mL). b) Size distributions of the PolyMags@DOX (1 mg/mL) nanoparticles tested by DLS. PDI:0.086; size: 121.1nm.

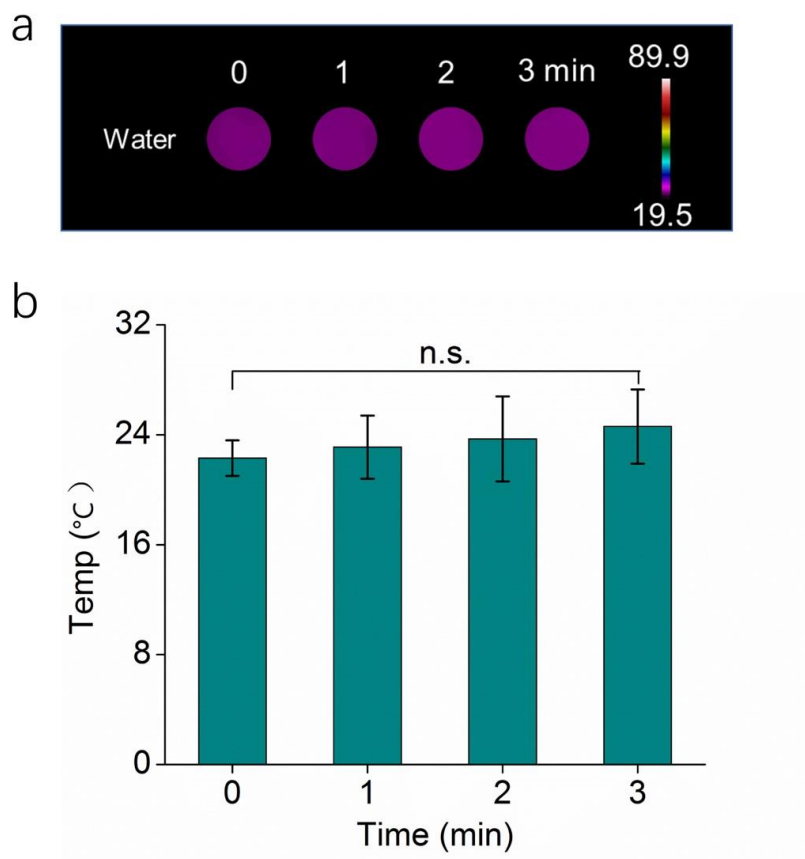

**Figure. S4.** a) Thermal images and b) quantitative temperature change (n=3). The results were shown as the mean  $\pm$  s.d. The temperature of water was monitored by a thermal camera after irradiation with NIR laser (680 nm) at 0.8 w/cm<sup>2</sup> at different time point (0, 1, 2, and 3 min). Statistical analysis was performed with a two-tailed Student's t-test, n.s. p>0.05.

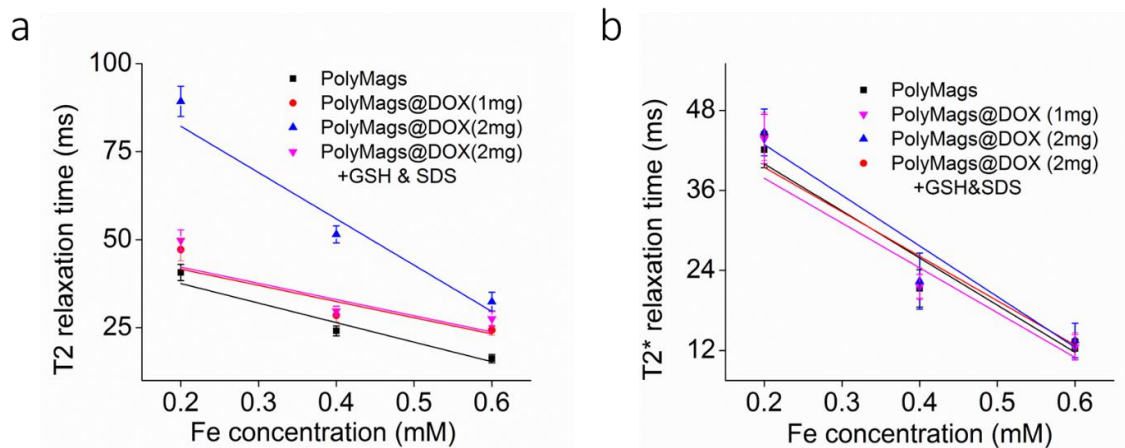

**Figure. S5.** T2 and T2\* relaxation time of empty PolyMags, the PolyMags@DOX (1 mg/mL) and the PolyMags@DOX (2 mg/mL) treated with GSH in the presence of SDS negatively correlated with Fe concentration. Statistical analysis was performed with Pearson correlation.

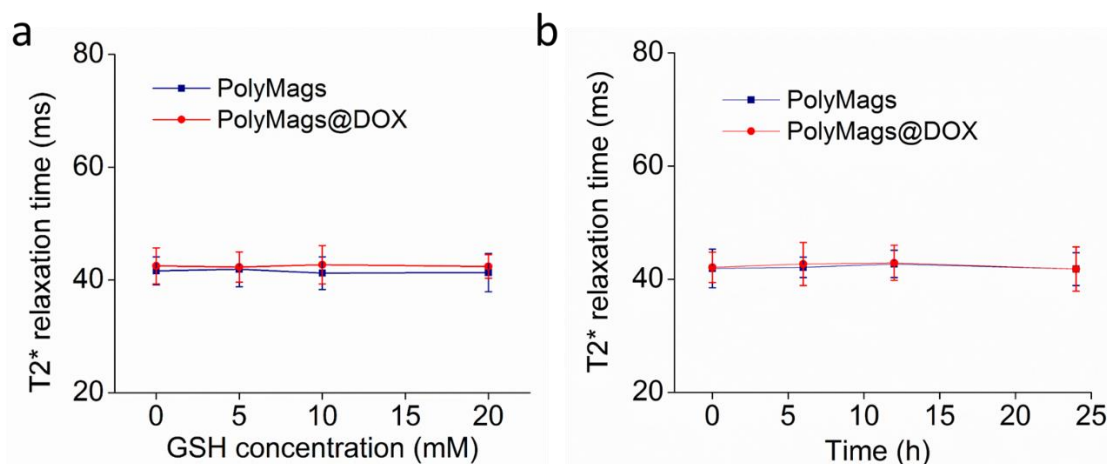

**Figure. S6.** Time-dependent  $T_2^*$  MRI activation of the nanoprobe. a), No changes in the  $T_2^*$  activation of empty PolyMags and the PolyMags@DOX (2 mg/mL) at 0, 5, 10 and 20 mM concentration of GSH. b), No changes in the  $T_2^*$  of empty PolyMags and the PolyMags@DOX (2 mg/mL) were observed at 20 mM concentration of GSH at different time points.

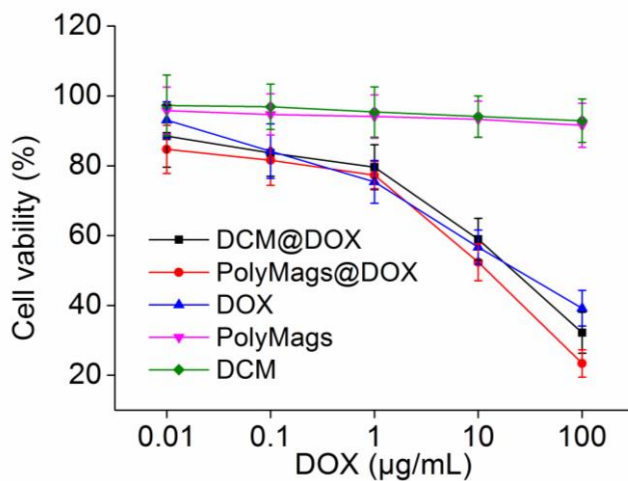

**Figure. S7.** Cell viabilities of the PolyMags@DOX (2 mg/mL), empty PolyMags, DCM@DOX, free DOX and DCM by MTS assay. MCF-7 cells were treated with various concentrations of DOX-loaded nanoparticles, free DOX and DCM control for 48 h at identical DOX and DCM concentrations, respectively. Values reported are mean  $\pm$  s. d. (n=3).



**Table. S1.** The  $R_2$  values,  $T_2$  SNR of empty PolyMags and the PolyMags@DOX (2 mg/mL).

| Time (h) | PolyMags           |                      |            | PolyMags@DOX       |                      |            |
|----------|--------------------|----------------------|------------|--------------------|----------------------|------------|
|          | $R_2$ ( $S^{-1}$ ) | $R_2^*$ ( $S^{-1}$ ) | $T_2$ /SNR | $R_2$ ( $S^{-1}$ ) | $R_2^*$ ( $S^{-1}$ ) | $T_2$ /SNR |
| 0        | 11.0±0.4           | 15.4±1.0             | 51.8±2.5   | 11.0±0.7           | 15.3±0.9             | 53.2±2.1   |
| 2        | 18.2±1.1           | 25.6±2.7             | 27.2±3.2   | 11.3 ±0.6          | 26.1±2.1             | 51.2±3.7   |
| 6        | 18.7±1.0           | 27.7±2.7             | 23.3±2.7   | 18.4±1.3           | 28.1±2.4             | 24.1±3.1   |
| 18       | 21.8±1.0           | 28.8±3.1             | 20.0±3.1   | 21.2 ±1.0          | 29.0±2.4             | 21.1±2.0   |

$R_2$  and  $T_2$  SNR of tumors were measured before and after injection of empty PolyMags and the PolyMags@DOX (2 mg/mL) (time points: 0, 2, 6, 18 h; n=3) via tail vein (100  $\mu$ L/mL, 300  $\mu$ L). The mean T2WI signal intensities was measured for each tumor ( $S_{\text{mean}}$ ).

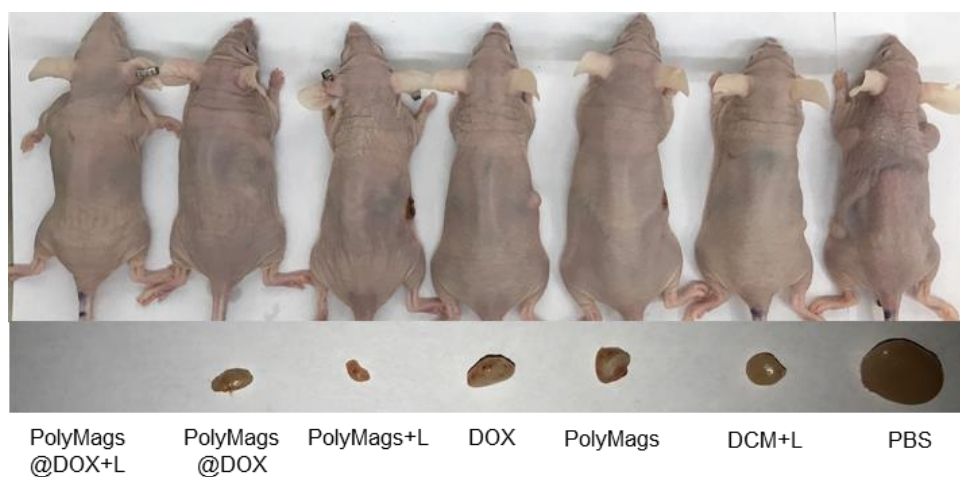

**Figure. S8.** Images of mice and tumors collected from all groups after various treatments and light irradiation. Note: (1) PolyMags@DOX + L, (2) PolyMags@DOX, (3) PolyMags + L, (4) DOX, (5) PolyMags, (6) DCM + L, (7) PBS.
